# Supplementary material
Source: publisher figshare collection journal article supplement (https://rs.figshare.com/ndownloader/files/30793050)
Supplement: Supplementary file 1 [file 30793050]

## Figure S2: CG7379KD does not affect the localisation of apicobasal polarity determinants

*Drosophila* pupal nota containing positively marked mutant clones for *lgl<sup>4</sup>*; CG7379KD, CG7379KD alone, or *lgl<sup>4</sup>* alone (highlighted by dashed lines).

Nota were stained for the following proteins: **(a-c)** discs large, **(e-g)** aPKC, **(i-k)** bazooka, **(m-o)** crumbs. Discs large and aPKC disruption was most severe in *lgl<sup>4</sup>* mutant clones, as quantified in panels **(d and h)**. No effect was observed when staining for the apical polarity proteins bazooka and crumbs **(l and p)**. n ≥ 55 junctions from a minimum of 4 animals for each genotype. Scale bars = 10µm. Error bars represent ± s.e.m. Student's T test was performed to determine statistical significance. \*p<0.05; \*\*p<0.01; \*\*\*p<0.001.
